# Supplementary material for: The value of autopsy in preterm infants at a Swedish tertiary neonatal intensive care unit 2002–2018
Source: PubMed Central journal article supplement (PMC8266827; doi:10.1038/s41598-021-93358-7), 2021-07-08
Supplement: 41598_2021_93358_MOESM1_ESM.pdf [file 41598_2021_93358_MOESM1_ESM.pdf]

# **The Value of Autopsy in Preterm Infants at a Swedish Tertiary Neonatal Intensive Care Unit 2002-2018**

Alice Hoffsten MD<sup>1</sup>, Laszlo Markasz MD PhD<sup>1,2</sup>, Katharina Ericson MD<sup>3</sup>, Leif D Nelin MD <sup>1,4</sup> and Richard Sindelar MD PhD<sup>1,2</sup>

<sup>1</sup>Department of Women's and Children's Health, Uppsala University, Uppsala, Sweden

<sup>2</sup>Neonatology Division, Uppsala University Children's Hospital, Uppsala, Sweden

<sup>3</sup>Department of Pathology, Uppsala University Hospital, Uppsala, Sweden

<sup>4</sup>Nationwide Children's Hospital, Ohio State University College of Medicine, Columbus, Ohio, USA

## Supplement 1

| <b>Suspected Cause of Death</b>                     | <b>Definite Cause of Death Found by Autopsy</b> |
|-----------------------------------------------------|-------------------------------------------------|
| Infection/Sepsis (Early)                            | Respiratory (BPD)                               |
| Congenital anomaly (Other anomaly)                  | Congenital anomaly (Neural anomaly)             |
| Other (Other anomaly)                               | Respiratory (RDS)                               |
| Infection/Sepsis (Early, suspected)                 | Other (Other anomaly)                           |
| Infection/Sepsis (Early, suspected)                 | Respiratory (RDS)                               |
| Other (Metabolic)                                   | NEC + Sepsis                                    |
| Respiratory (Miscellaneous)                         | Infection/Sepsis (Late)                         |
| Other (Other anomaly)                               | Congenital (Other anomaly)                      |
| Other (Shock/anemia/bleeding)                       | Infection/Sepsis (Late)                         |
| Respiratory (Other)                                 | Respiratory (Pulmonary Hypoplasia)              |
| Infection/Sepsis (Late)                             | NEC                                             |
| Respiratory (Other)                                 | Congenital (Other anomaly)                      |
| NEC (Suspected)                                     | Other (premature)                               |
| Respiratory (Pneumothorax)                          | Other (TTTS)                                    |
| Respiratory (Pneumothorax)                          | Other (TTTS)                                    |
| Respiratory (Pulmonary hypoplasia)                  | Respiratory (RDS)                               |
| Other (Isolated spontaneous intestinal perforation) | Infection/Sepsis (Late)                         |
| Infection/Sepsis (Late)                             | Other (Volvulus/malrotation)                    |
| Other (Metabolic)                                   | IVH                                             |
| Asphyxia (Perinatal)                                | Respiratory (RDS)                               |
| Other (Isolated spontaneous intestinal perforation) | NEC                                             |
| Infection/Sepsis (Late)                             | NEC + Sepsis                                    |
| Infection/Sepsis (Late, suspected)                  | Infection/Sepsis (Early)                        |
| Congenital (Chromosomal abnormality)                | Respiratory (PPHN)                              |
| Respiratory (Pulmonary hypoplasia)                  | Congenital (Other anomaly)                      |
| Congenital (Other anomaly)                          | Infection/Sepsis (Early)                        |
| Asphyxia (Perinatal)                                | NEC                                             |
| Respiratory (BPD)                                   | Respiratory (PPHN)                              |
| Other (Metabolic/electrolyte/endocrine disorders)   | NEC                                             |
| Other (Prematurity)                                 | Infection/Sepsis (Early)                        |
| Other (Other anomaly)                               | Infection/Sepsis (Late)                         |
| Respiratory (Hemothorax)                            | NEC + Sepsis                                    |
| Infection/Sepsis (Late)                             | NEC                                             |
| Respiratory (Pulmonary hypoplasia)                  | Respiratory (Miscellaneous)                     |
| Respiratory (Hemothorax)                            | Infection/Sepsis (Early)                        |
| Other (TTTS)                                        | Other (Shock/anemia/bleeding)                   |
| Asphyxia (Perinatal)                                | Other (Shock/anemia/bleeding)                   |
| Other (Volvulus/malrotation)                        | Congenital (Other anomaly)                      |
| Other (Chock/anemia/bleeding)                       | Infection/Sepsis (Early)                        |
| Respiratory (RDS)                                   | IVH                                             |
| Other (Metabolic/electrolyte/endocrine disorders)   | Other (Shock/anemia/bleeding)                   |
| Respiratory (PPHN)                                  | Other (Shock/anemia/bleeding)                   |

|                                                     |                                                     |
|-----------------------------------------------------|-----------------------------------------------------|
| Infection/Sepsis (Early)                            | Other (Isolated spontaneous intestinal perforation) |
| Asphyxia (Intrauterine)                             | Respiratory (Pulmonary hypoplasia)                  |
| Respiratory (Pulmonary hypoplasia)                  | Other (TTTS)                                        |
| Other (Isolated spontaneous intestinal perforation) | Infection/Sepsis (Late)                             |
| Infection/Sepsis (Late, suspected)                  | NEC + Sepsis                                        |
| Infection/Sepsis (Late)                             | NEC + Sepsis                                        |

| <b>Suspected Cause of Death Confirmed by Autopsy</b> |
|------------------------------------------------------|
| NEC                                                  |
| Infection/Sepsis (Late)                              |
| Infection/Sepsis (Late)                              |
| Infection/Sepsis (Late)                              |
| Infection/Sepsis (Late)                              |
| Infection/Sepsis (Late)                              |
| Infection/Sepsis (Late)                              |
| Respiratory (Pulmonary Hypoplasia)                   |
| Other (Other anomaly)                                |
| Infection/Sepsis (Late)                              |
| NEC+ Sepsis                                          |
| NEC                                                  |
| Congenital (Other anomaly)                           |
| Infection/Sepsis (Early)                             |
| IVH                                                  |
| Infection/Sepsis (Late)                              |
| Respiratory (Miscellaneous)                          |
| NEC                                                  |
| Infection/Sepsis (Late)                              |
| IVH                                                  |
| Respiratory (Pulmonary hypoplasia)                   |
| Infection/Sepsis (Late)                              |
| Asphyxia (Intrauterine)                              |
| Infection/Sepsis (Late)                              |

BPD, Bronchopulmonary Disease; RDS, Respiratory Distress Syndrome; NEC, Necrotizing Enterocolitis; TTTS, Twin-to-Twin Transfusion Syndrome; IVH, Intraventricular Hemorrhage; PPHN, Persistent Pulmonary Hypertension of the Newborn,
